# Supplementary material for: Plant-based dietary patterns and lung cancer mortality: a perspective cohort study
Source: Royal Society of Chemistry journal article supplement (doi:10.1039/d3fo01803b), 2023-01-01
Supplement: d3fo01803b1.pdf [file d3fo01803b1.pdf]

## Plant-Based Dietary Patterns and Lung Cancer Mortality: A Perspective Cohort

### Study

Supplemental material

**Table S1** Scoring methods and examples of food items comprising the 18 food groups that contribute to PDI, hPDI, and uPDI scores \*.

| Food Groups                    | Example food descriptions                                                                    | Scoring Method |          |          |
|--------------------------------|----------------------------------------------------------------------------------------------|----------------|----------|----------|
|                                |                                                                                              | PDI            | hPDI     | uPDI     |
| <b>Healthful Plant Foods</b>   |                                                                                              |                |          |          |
| Whole grains                   | Whole grains such as breakfast cereal, brown rice, and oatmeal                               | Positive       | Positive | Reverse  |
| Fruits                         | Whole fruits such as bananas, apples, oranges, and blueberries                               | Positive       | Positive | Reverse  |
| Vegetables                     | Dark green, red-orange, and starchy vegetables such as tomatoes, broccoli, carrots, and yams | Positive       | Positive | Reverse  |
| Nuts                           | Peanuts, tree nuts, and seeds                                                                | Positive       | Positive | Reverse  |
| Legumes                        | Legumes such as beans, lentils, and peas                                                     | Positive       | Positive | Reverse  |
| Vegetable oils                 | Salad dressing: oil and vinegar, canola oil, olive oil, and Crisco                           | Positive       | Positive | Reverse  |
| Tea & Coffee                   | Regular coffee, decaf coffee; green, black, and herbal teas                                  | Positive       | Positive | Reverse  |
| <b>Unhealthful Plant Foods</b> |                                                                                              |                |          |          |
| Fruit juices                   | Citrus and non-citrus fruit juices such as orange juice and apple juice                      | Positive       | Reverse  | Positive |
| Refined grains                 | Refined grains such as bagels, muffins, white rice, and white bread                          | Positive       | Reverse  | Positive |
| Potatoes                       | White potatoes in forms such as french fries, baked potatoes, etc.                           | Positive       | Reverse  | Positive |
| Sugar-sweetened beverages      | Sodas, carbonated beverages with sugar, etc.                                                 | Positive       | Reverse  | Positive |
| Sweets and desserts            | Sweet beverages (excl. juice), pancakes, pastries, and desserts                              | Positive       | Reverse  | Positive |
| <b>Animal Foods</b>            |                                                                                              |                |          |          |

|                          |                                                                    |         |         |         |
|--------------------------|--------------------------------------------------------------------|---------|---------|---------|
| Animal fat               | Products such as butter, ghee, margarine, and bacon fat            | Reverse | Reverse | Reverse |
| Dairy                    | Yogurt, ice cream, whole milk, cheese, etc.                        | Reverse | Reverse | Reverse |
| Egg                      | Eggs and egg substitutes                                           | Reverse | Reverse | Reverse |
| Fish or Seafood          | Finfish, shellfish, shrimp, and other seafood                      | Reverse | Reverse | Reverse |
| Meat                     | Chicken, turkey, Cornish hens, duck, goose, processed meats, etc.  | Reverse | Reverse | Reverse |
| Misc. animal-based foods | Pizza, cream soups like chowders, mayonnaise, and sandwich spreads | Reverse | Reverse | Reverse |

\*: Satija, A., Bhupathiraju, S.N., Rimm, E.B., Spiegelman, D., Chiuve, S.E., Borgi, L., Willett, W.C., Manson, J.E., Sun, Q., Hu, F.B. Plant-Based Dietary Patterns and Incidence of Type 2 Diabetes in US Men and Women: Results from Three Prospective Cohort Studies. PLoS medicine 2016, 13, e1002039, doi:10.1371/journal.pmed.1002039.

**Table S2.** Baseline Characteristics of 408 Participants in the lung cancer follow-up study to Quintiles of PDI Score

| Characteristics                               | Overall     | Q1          | Q2         | Q3         | Q4         | P value* |
|-----------------------------------------------|-------------|-------------|------------|------------|------------|----------|
| <b>No. of patients/deaths</b>                 | 408/240     | 119/68      | 101/58     | 92/52      | 96/62      | □        |
| <b>hPDI score (mean±SD)</b>                   | 49.98±5.95  | 43.02±2.84  | 48.41±1.15 | 52.42±1.06 | 57.91±2.65 | <0.001   |
| <b>Age at diagnosis (mean±SD)</b>             | 61.1±8.3    | 61.3±8.48   | 60.13±8.07 | 61.7±8.8   | 61.82±7.92 | 0.471    |
| <b>Sex, n (%)</b>                             |             |             |            |            |            | <0.001   |
| Male                                          | 283(69.36%) | 71(17.4%)   | 58(14.22%) | 71(17.4%)  | 83(20.34%) |          |
| Female                                        | 125(30.64%) | 48(11.76%)  | 43(10.54%) | 21(5.15%)  | 13(3.19%)  |          |
| <b>Education level, n (%)</b>                 |             |             |            |            |            | 0.034    |
| Junior secondary or below                     | 273(66.91%) | 90(22.06%)  | 65(15.93%) | 61(14.95%) | 57(13.97%) | □        |
| Senior high school/technical secondary school | 80(19.61%)  | 18(4.41%)   | 24(5.88%)  | 21(5.15%)  | 17(4.17%)  | □        |
| Junior college/university or above            | 55(13.48%)  | 11(2.7%)    | 12(2.94%)  | 10(2.45%)  | 22(5.39%)  | □        |
| <b>Region, n (%)</b>                          |             |             |            |            |            | 0.283    |
| City                                          | 287(70.34%) | 80(19.61%)  | 68(16.67%) | 64(15.69%) | 75(18.38%) | □        |
| Rural                                         | 121(29.66%) | 39(9.56%)   | 33(8.09%)  | 28(6.86%)  | 21(5.15%)  | □        |
| <b>Race, n (%)</b>                            |             |             |            |            |            | 0.612    |
| Han                                           | 349(85.54%) | 101(24.75%) | 84(20.59%) | 78(19.12%) | 86(21.08%) | □        |
| Other                                         | 59(14.46%)  | 18(4.41%)   | 17(4.17%)  | 14(3.43%)  | 10(2.45%)  | □        |
| <b>Income per month, RMB, n (%)</b>           |             |             |            |            |            | 0.497    |
| < 5000                                        | 182(44.61%) | 62(15.2%)   | 39(9.56%)  | 43(10.54%) | 38(9.31%)  | □        |
| 5000-10000                                    | 60(14.71%)  | 15(3.68%)   | 17(4.17%)  | 13(3.19%)  | 15(3.68%)  | □        |
| ≥10000                                        | 166(40.69%) | 42(10.29%)  | 45(11.03%) | 36(8.82%)  | 43(10.54%) | □        |
| <b>Marital status, n (%)</b>                  |             |             |            |            |            | 0.239    |
| Married                                       | 365(89.46%) | 103(25.25%) | 94(23.04%) | 85(20.83%) | 83(20.34%) | □        |

|                                                           |              |                |                |                |                |                  |
|-----------------------------------------------------------|--------------|----------------|----------------|----------------|----------------|------------------|
| Unmarried/divorced/widowed                                | 43(10.54%)   | 16(3.92%)      | 7(1.72%)       | 7(1.72%)       | 13(3.19%)      | □                |
| <b>Smoke, n (%)</b>                                       |              |                |                |                |                | <b>0.001</b>     |
| No                                                        | 111(27.21%)  | 37(9.07%)      | 39(9.56%)      | 21(5.15%)      | 14(3.43%)      | □                |
| Yes                                                       | 297(72.79%)  | 82(20.1%)      | 62(15.2%)      | 71(17.4%)      | 82(20.1%)      | □                |
| <b>Alcohol drinking, n (%)</b>                            |              |                |                |                |                | <b>0.018</b>     |
| No                                                        | 178(43.63%)  | 55(13.48%)     | 55(13.48%)     | 36(8.82%)      | 32(7.84%)      | □                |
| Yes                                                       | 230(56.37%)  | 64(15.69%)     | 46(11.27%)     | 56(13.73%)     | 64(15.69%)     | □                |
| <b>Dietary change, n (%)</b>                              |              |                |                |                |                | <b>0.529</b>     |
| No                                                        | 389(95.34%)  | 113(27.7%)     | 96(23.53%)     | 86(21.08%)     | 94(23.04%)     | □                |
| Yes                                                       | 19(4.66%)    | 6(1.47%)       | 5(1.23%)       | 6(1.47%)       | 2(0.49%)       | □                |
| <b>AJCC stage at diagnosis, n (%)</b>                     |              |                |                |                |                | <b>0.734</b>     |
| I-II                                                      | 49(12.01%)   | 16(3.92%)      | 10(2.45%)      | 13(3.19%)      | 10(2.45%)      | □                |
| III-IV                                                    | 359(87.99%)  | 103(25.25%)    | 91(22.3%)      | 79(19.36%)     | 86(21.08%)     | □                |
| <b>Histological type, n (%)</b>                           |              |                |                |                |                | <b>0.069</b>     |
| Small cell lung cancer                                    | 310(75.98%)  | 98(24.02%)     | 68(16.67%)     | 69(16.91%)     | 75(18.38%)     | □                |
| Non-small lung cancer                                     | 98(24.02%)   | 21(5.15%)      | 33(8.09%)      | 23(5.64%)      | 21(5.15%)      | □                |
| <b>Comorbidities, n (%)</b>                               |              |                |                |                |                | <b>0.556</b>     |
| No                                                        | 170(41.67%)  | 53(12.99%)     | 39(9.56%)      | 42(10.29%)     | 36(8.82%)      | □                |
| Yes                                                       | 238(58.33%)  | 66(16.18%)     | 62(15.2%)      | 50(12.25%)     | 60(14.71%)     | □                |
| <b>Physical activity level, MET-hours/week, (mean±SD)</b> | 17.4±9.8     | 101.38±100.07  | 91.04±89.93    | 77.97±80.09    | 80.79±69.89    | <b>0.186</b>     |
| <b>Energy intake, kcal/day, (mean±SD)</b>                 | 1643.4±465.4 | 1483.96±402.52 | 1559.32±368.01 | 1637.96±428.75 | 1929.16±542.77 | <b>&lt;0.001</b> |
| <b>BMI at diagnosis, kg/m<sup>2</sup></b>                 | 22.7±3.5     | 23.27±2.8      | 23.47±2.56     | 22.35±2.9      | 22.45±3.67     | <b>0.672</b>     |
| <b>Surgery, n (%)</b>                                     |              |                |                |                |                | <b>0.518</b>     |
| No                                                        | 332(81.37%)  | 96(28.92%)     | 87(26.2%)      | 74(22.29%)     | 75(22.59%)     |                  |

|                                |             |              |              |              |              |       |
|--------------------------------|-------------|--------------|--------------|--------------|--------------|-------|
| Yes                            | 76(18.63%)  | 23(30.26%)   | 14(18.42%)   | 18(23.68%)   | 21(27.63%)   |       |
| <b>Chemotherapy, n (%)</b>     |             |              |              |              |              | 0.041 |
| No                             | 38(9.31%)   | 12(31.58%)   | 9(23.68%)    | 14(36.84%)   | 3(7.89%)     |       |
| Yes                            | 370(90.69%) | 107(28.92%)  | 92(24.86%)   | 78(21.08%)   | 93(25.14%)   |       |
| <b>Radiotherapy, n (%)</b>     |             |              |              |              |              | 0.423 |
| No                             | 333(81.62%) | 96(28.83%)   | 83(24.92%)   | 71(21.32%)   | 83(24.92%)   |       |
| Yes                            | 75(18.38%)  | 5.64(19.33%) | 4.41(17.82%) | 5.15(22.83%) | 3.19(13.54%) |       |
| <b>Targeted therapy, n (%)</b> |             |              |              |              |              | 0.165 |
| No                             | 276(67.65%) | 82(29.71%)   | 63(22.83%)   | 70(25.36%)   | 61(22.1%)    |       |
| Yes                            | 132(32.35%) | 37(28.03%)   | 38(28.79%)   | 22(16.67%)   | 35(26.52%)   |       |
| <b>Immunotherapy, n (%)</b>    |             |              |              |              |              | 0.386 |
| No                             | 326(79.9%)  | 99(30.37%)   | 82(25.15%)   | 74(22.7%)    | 71(21.78%)   |       |
| Yes                            | 82(20.1%)   | 20(24.39%)   | 19(23.17%)   | 18(21.95%)   | 25(30.49%)   |       |

PDI, plant-based diet index; Q, quartile; SD, standard deviation; MET, metabolic equivalents of task; BMI, body mass index.

\*P values were determined with one-way ANOVA for continuous variables, and the chi-square test for categorical variables.

**Table S3.** Baseline Characteristics of 408 Participants in the lung cancer follow-up study to Quintiles of uPDI Score

| Characteristics                               | Overall     | Q1         | Q2         | Q3         | Q4         | P value* |
|-----------------------------------------------|-------------|------------|------------|------------|------------|----------|
| <b>No. of patients/deaths</b>                 | 408/240     | 112/68     | 97/50      | 97/54      | 102/68     |          |
| <b>hPDI score (mean±SD)</b>                   | 52.21±6.71  | 43.84±2.80 | 50.21±1.38 | 54.80±1.50 | 60.82±2.52 | <0.001   |
| <b>Age at diagnosis (mean±SD)</b>             | 61.10±8.30  | 61.46±8.39 | 61.02±8.26 | 60.28±8.22 | 62.05±8.44 | 0.495    |
| <b>Sex, n (%)</b>                             |             |            |            |            |            | 0.070    |
| Male                                          | 283(69.36%) | 84(20.59%) | 72(17.65%) | 58(14.22%) | 69(16.91%) |          |
| Female                                        | 125(30.64%) | 28(6.86%)  | 25(6.13%)  | 39(9.56%)  | 33(8.09%)  |          |
| <b>Education level, n (%)</b>                 |             |            |            |            |            | <0.001   |
| Junior secondary or below                     | 273(66.91%) | 55(13.48%) | 62(15.20%) | 67(16.42%) | 89(21.81%) |          |
| Senior high school/technical secondary school | 80(19.61%)  | 31(7.60%)  | 21(5.15%)  | 20(4.90%)  | 8(1.96%)   |          |
| Junior college/university or above            | 55(13.48%)  | 26(6.37%)  | 14(3.43%)  | 10(2.45%)  | 5(1.23%)   |          |
| <b>Region, n (%)</b>                          |             |            |            |            |            | <0.001   |
| City                                          | 287(70.34%) | 95(23.28%) | 72(17.65%) | 68(16.67%) | 52(12.75%) |          |
| Rural                                         | 121(29.66%) | 17(4.17%)  | 25(6.13%)  | 29(7.11%)  | 50(12.25%) |          |
| <b>Race, n (%)</b>                            |             |            |            |            |            | 0.720    |
| Han                                           | 349(85.54%) | 96(23.53%) | 80(19.61%) | 83(20.34%) | 90(22.06%) |          |
| Other                                         | 59(14.46%)  | 16(3.92%)  | 17(4.17%)  | 14(3.43%)  | 12(2.94%)  |          |
| <b>Income per month, RMB, n (%)</b>           |             |            |            |            |            | 0.017    |
| < 5000                                        | 182(44.61%) | 39(9.56%)  | 41(10.05%) | 49(12.01%) | 53(12.99%) |          |
| 5000-10000                                    | 60(14.71%)  | 26(6.37%)  | 16(3.92%)  | 11(2.70%)  | 7(1.72%)   |          |
| ≥10000                                        | 166(40.69%) | 47(11.52%) | 40(9.80%)  | 37(9.07%)  | 42(10.29%) |          |
| <b>Marital status, n (%)</b>                  |             |            |            |            |            | 0.070    |
| Married                                       | 365(89.46%) | 93(22.79%) | 89(21.81%) | 88(21.57%) | 95(23.28%) |          |

|                                                           |                |                |                |                |                |        |
|-----------------------------------------------------------|----------------|----------------|----------------|----------------|----------------|--------|
| Unmarried/divorced/widowed                                | 43(10.54%)     | 19(4.66%)      | 8(1.96%)       | 9(2.21%)       | 7(1.72%)       |        |
| <b>Smoke, n (%)</b>                                       |                |                |                |                |                | 0.007  |
| No                                                        | 111(27.21%)    | 22(5.39%)      | 26(6.37%)      | 39(9.56%)      | 24(5.88%)      |        |
| Yes                                                       | 297(72.79%)    | 90(22.06%)     | 71(17.40%)     | 58(14.22%)     | 78(19.12%)     |        |
| <b>Alcohol drinking, n (%)</b>                            |                |                |                |                |                | 0.169  |
| No                                                        | 178(43.63%)    | 43(10.54%)     | 37(9.07%)      | 47(11.52%)     | 51(12.50%)     |        |
| Yes                                                       | 230(56.37%)    | 69(16.91%)     | 60(14.71%)     | 50(12.25%)     | 51(12.50%)     |        |
| <b>Dietary change, n (%)</b>                              |                |                |                |                |                | 0.516  |
| No                                                        | 389(95.34%)    | 104(25.49%)    | 93(22.79%)     | 94(23.04%)     | 98(24.02%)     |        |
| Yes                                                       | 19(4.66%)      | 8(1.96%)       | 4(0.98%)       | 3(0.74%)       | 4(0.98%)       |        |
| <b>AJCC stage at diagnosis, n (%)</b>                     |                |                |                |                |                | 0.064  |
| I-II                                                      | 49(12.01%)     | 10(2.45%)      | 16(3.92%)      | 16(3.92%)      | 7(1.72%)       |        |
| III-IV                                                    | 359(87.99%)    | 102(25%)       | 81(19.85%)     | 81(19.85%)     | 95(23.28%)     |        |
| <b>Histological type, n (%)</b>                           |                |                |                |                |                | 0.788  |
| Small cell lung cancer                                    | 310(75.98%)    | 89(21.81%)     | 73(17.89%)     | 72(17.65%)     | 76(18.63%)     |        |
| Non-small lung cancer                                     | 98(24.02%)     | 23(5.64%)      | 24(5.88%)      | 25(6.13%)      | 26(6.37%)      |        |
| <b>Comorbidities, n (%)</b>                               |                |                |                |                |                | 0.422  |
| No                                                        | 170(41.67%)    | 54(13.24%)     | 37(9.07%)      | 38(9.31%)      | 41(10.05%)     |        |
| Yes                                                       | 238(58.33%)    | 58(14.22%)     | 60(14.71%)     | 59(14.46%)     | 61(14.95%)     |        |
| <b>Physical activity level, MET-hours/week, (mean±SD)</b> | 89.20±86.6     | 82.04±74.03    | 76.68±70.31    | 100.34±98.7    | 96.37±100.41   | 0.169  |
| <b>Energy intake, kcal/day, (mean±SD)</b>                 | 1643.40±465.40 | 1936.61±527.02 | 1696.15±370.89 | 1532.86±381.85 | 1371.17±348.69 | <0.001 |
| <b>BMI at diagnosis, kg/m<sup>2</sup></b>                 | 22.70±3.50     | 22.89±3.21     | 23.08±2.83     | 23.35±2.32     | 22.50±3.41     | 0.620  |
| <b>Surgery, n (%)</b>                                     |                |                |                |                |                | 0.076  |
| No                                                        | 332(81.37%)    | 92(27.71%)     | 75(22.59%)     | 74(22.29%)     | 91(27.41%)     |        |
| Yes                                                       | 76(18.63%)     | 20(26.32%)     | 22(28.95%)     | 23(30.26%)     | 11(14.47%)     |        |

|                                |             |              |             |              |              |        |
|--------------------------------|-------------|--------------|-------------|--------------|--------------|--------|
| <b>Chemotherapy, n (%)</b>     |             |              |             |              |              | 0.3614 |
| No                             | 38(9.31%)   | 9(23.68%)    | 7(18.42%)   | 8(21.05%)    | 14(36.84%)   |        |
| Yes                            | 370(90.69%) | 103(27.84%)  | 90(24.32%)  | 89(24.05%)   | 88(23.78%)   |        |
| <b>Radiotherapy, n (%)</b>     |             |              |             |              |              | 0.4442 |
| No                             | 333(81.62%) | 89(26.73%)   | 84(25.23%)  | 76(22.82%)   | 84(25.23%)   |        |
| Yes                            | 75(18.38%)  | 5.64(20.54%) | 3.19(13.4%) | 5.15(21.65%) | 4.41(17.65%) |        |
| <b>Targeted therapy, n (%)</b> |             |              |             |              |              | 0.7406 |
| No                             | 276(67.65%) | 72(26.09%)   | 69(25%)     | 67(24.28%)   | 68(24.64%)   |        |
| Yes                            | 132(32.35%) | 40(30.3%)    | 28(21.21%)  | 30(22.73%)   | 34(25.76%)   |        |
| <b>Immunotherapy, n (%)</b>    |             |              |             |              |              | 0.9567 |
| No                             | 326(79.9%)  | 89(27.3%)    | 76(23.31%)  | 79(24.23%)   | 82(25.15%)   |        |
| Yes                            | 82(20.1%)   | 23(28.05%)   | 21(25.61%)  | 18(21.95%)   | 20(24.39%)   |        |

uPDI, unhealthful plant-based diet index; Q, quartile; SD, standard deviation; IQR, interquartile; MET, metabolic equivalents of task; BMI, body mass index.

\*P values were determined with one-way ANOVA for continuous variables, and the chi-square test for categorical variables.



**Table S4.** Nutrition intakes by quartiles of hPDI score

|                                  | hPDI score     |                |                |                | P value* |
|----------------------------------|----------------|----------------|----------------|----------------|----------|
|                                  | Q1             | Q2             | Q3             | Q4             |          |
| Carbohydrate (g/d)               | 245.56±66.36   | 234.76±52.61   | 241.99±63.62   | 225.79±54.48   | 0.101    |
| Dietary fiber (g/d)              | 14.81±6.59     | 15.54±4.62     | 16.25±5.71     | 17.19±4.96     | 0.019    |
| Dietary cholesterol (mg/d)       | 442.01±192.79  | 380.72±186.68  | 308.56±171.61  | 300.05±185.62  | <0.001   |
| Soy isoflavone (mg/d)            | 19.95±14.01    | 22.65±11.81    | 20.68±10.84    | 25.34±10.21    | 0.009    |
| Saturated fatty acid (g/d)       | 11.69±6.51     | 10.68±5.22     | 9.04±5.74      | 8.07±3.76      | <0.001   |
| Monounsaturated fatty acid (g/d) | 11.03±6.24     | 10.46±4.99     | 9.27±5.14      | 8.99±3.93      | 0.017    |
| Polyunsaturated fatty acid (g/d) | 6.42±2.78      | 6.71±2.73      | 6.49±2.61      | 7.06±2.19      | 0.326    |
| Total carotene (ug/d)            | 1530.94±837.27 | 1543.78±481.98 | 1665.78±572.82 | 1899.52±565.72 | <0.001   |
| α-carotene (ug/d)                | 120.39±109.46  | 109.87±65.49   | 129.94±117.94  | 130.31±87.47   | 0.336    |
| β-carotene (ug/d)                | 998.16±780.37  | 909.44±406.11  | 975.14±436.95  | 1213.24±556.11 | 0.001    |
| Folic acid (ug/d)                | 189.33±103.19  | 185.83±58.34   | 191.92±59.31   | 207.87±56.77   | 0.145    |
| Vitamin C (mg/d)                 | 90.58±59.93    | 102.57±64.01   | 103.49±62.59   | 107.73±59.57   | 0.235    |
| Vitamin E (mg/d)                 | 15.86±7.47     | 16.94±6.21     | 16.69±7.01     | 18.39±5.29     | 0.060    |
| Magnesium (mg/d)                 | 293.57±96.01   | 288.09±78.81   | 295.11±87.04   | 297.39±76.11   | 0.865    |
| Zinc (mg/d)                      | 10.78±3.19     | 10.48±3.13     | 9.99±2.81      | 9.74±2.56      | 0.060    |
| Selenium (ug/d)                  | 40.17±19.18    | 37.39±19.34    | 36.82±18.75    | 34.29±12.14    | 0.147    |
| Glycemic Index                   | 68.81±5.17     | 68.43±4.72     | 68.59±4.91     | 67.29±5.35     | 0.161    |
| Glycemic Load                    | 167.51±39.01   | 159.83±32.56   | 164.51±37.19   | 151.76±36.13   | 0.017    |

hPDI, healthful plant-based diet index; Q, quartile.

\*P values were determined with one-way ANOVA.

**Table S5.** Adjusted hazard ratio (HR) and 95% confidence intervals (CIs) for the association between Overall Plant-based Diet Index (after energy adjusting) and total mortality of lung cancer (n = 408).

| □                                 | Quartiles of Scores* |                  |                  |                  | P for Trend** | Per 10 unit†     |
|-----------------------------------|----------------------|------------------|------------------|------------------|---------------|------------------|
|                                   | Q1                   | Q2               | Q3               | Q4               |               |                  |
| <b>PDI</b>                        |                      |                  |                  |                  |               |                  |
| Score, range                      | 36-50                | 50-54            | 54-58            | 58-69            |               | 1.04 (0.84-1.29) |
| Numbers (deaths)                  | 106 (63)             | 115 (69)         | 103 (58)         | 84 (50)          |               |                  |
| Model 1, HR (95% CI) <sup>a</sup> | 1.00                 | 1.01 (0.72-1.42) | 0.92 (0.65-1.32) | 0.98 (0.68-1.42) | 0.792         |                  |
| Model 2, HR (95% CI) <sup>b</sup> | 1.00                 | 1.00 (0.70-1.41) | 0.99 (0.69-1.43) | 1.02(0.70-1.48)  | 0.927         |                  |
| Model 3, HR (95% CI) <sup>c</sup> | 1.00                 | 0.97 (0.66-1.41) | 0.91 (0.62-1.35) | 1.04 (0.70-1.55) | 0.979         |                  |
| <b>hPDI</b>                       |                      |                  |                  |                  |               |                  |
| Score, range                      | 40-49                | 49-53            | 53-58            | 58-74            |               | 0.83 (0.69-0.99) |
| Numbers (deaths)                  | 110 (67)             | 106 (59)         | 100 (62)         | 92 (52)          |               |                  |
| Model 1, HR (95% CI) <sup>a</sup> | 1.00                 | 0.81 (0.57-1.15) | 1.01 (0.71-1.42) | 0.78 (0.54-1.12) | 0.471         |                  |
| Model 2, HR (95% CI) <sup>b</sup> | 1.00                 | 0.83 (0.59-1.19) | 0.93 (0.65-1.32) | 0.70 (0.48-1.02) | 0.148         |                  |
| Model 3, HR (95% CI) <sup>c</sup> | 1.00                 | 0.81 (0.56-1.17) | 1.02 (0.69-1.49) | 0.65 (0.43-0.98) | 0.173         |                  |
| <b>uPDI</b>                       |                      |                  |                  |                  |               |                  |
| Score, range                      | 36-49                | 49-54            | 54-58            | 58-74            |               | 1.18 (0.91-1.52) |
| Numbers (deaths)                  | 108 (59)             | 107 (59)         | 114 (71)         | 79 (51)          |               |                  |
| Model 1, HR (95% CI) <sup>a</sup> | 1.00                 | 1.05 (0.73-1.51) | 1.27 (0.90-1.79) | 1.47 (1.01-2.14) | 0.029         |                  |
| Model 2, HR (95% CI) <sup>b</sup> | 1.00                 | 1.08 (0.75-1.55) | 1.30 (0.92-1.84) | 1.43 (0.98-2.10) | 0.039         |                  |
| Model 3, HR (95% CI) <sup>c</sup> | 1.00                 | 1.14 (0.77-1.69) | 1.33 (0.92-1.93) | 1.30 (0.86-1.96) | 0.128         |                  |

PDI, plant-based diet index; hPDI, healthful plant-based diet index; uPDI, unhealthy plant-based diet index; HR, hazard ratio; CI, confidence interval; Q, quartile.

\* HR and 95% CI were calculated through the Cox proportional hazards regression model.

\*\* P-value for trend based on variables containing the median value for each group.

† Continuous intakes were calculated by per 10 unit increase.

<sup>a</sup> Crude model.

<sup>b</sup> Adjusted for age at diagnosis ( $\geq 60$ ,  $< 60$  years) and sex (male, female).

<sup>c</sup> Additionally Adjusted for race (Han, others), region (city, rural), education (junior secondary or below, senior high school/technical secondary school, junior college/university or above), income per month ( $< 5000$ ,  $5000-10000$ ,  $\geq 10000$  RMB), marital status (married, unmarried/divorced/widowed), smoking status (yes, no), alcohol intake (continuous, g/d), diet change (yes, no), BMI (continuous, kg/m<sup>2</sup>), physical activity (MET-hours/week), histological type (small cell lung cancer, non-small lung cancer), AJCC stage (I-II, III-IV), and comorbidities (yes, no), surgery (yes, no), chemotherapy (yes, no), radiotherapy (yes, no), targeted treatment (yes, no), and immunotherapy (yes, no).

<sup>d</sup> P-value for linear trend calculated from category median values.

**Table S6.** Adjusted hazard ratio (HR) and 95% confidence interval (CI) of lung cancer mortality by the quintiles of Overall Plant-based Diet Indices (n = 408).

| □                                 | Quartiles of Scores* |                  |                  |                  |                  | P for Trend** | Per 10 unit†     |
|-----------------------------------|----------------------|------------------|------------------|------------------|------------------|---------------|------------------|
|                                   | Q1                   | Q2               | Q3               | Q4               | Q5               |               |                  |
| <b>PDI</b>                        |                      |                  |                  |                  |                  |               | 1.03 (0.80-1.31) |
| Score, range                      | 31-45                | 45-48            | 48-52            | 52-55            | 55-67            |               |                  |
| Numbers (deaths)                  | 99 (57)              | 71 (39)          | 105 (59)         | 61 (35)          | 76 (50)          |               |                  |
| Model 1, HR (95% CI) <sup>a</sup> | 1.00                 | 0.94 (0.62-1.41) | 1.02 (0.71-1.46) | 0.99 (0.65-1.50) | 1.16 (0.79-1.70) | 0.430         |                  |
| Model 2, HR (95% CI) <sup>b</sup> | 1.00                 | 1.00 (0.66-1.51) | 1.05 (0.70-1.45) | 1.00 (0.65-1.54) | 1.12 (0.74-1.70) | 0.615         |                  |
| Model 3, HR (95% CI) <sup>c</sup> | 1.00                 | 0.93 (0.61-1.43) | 1.08 (0.73-1.60) | 1.12 (0.71-1.77) | 1.04 (0.67-1.62) | 0.795         |                  |
| <b>hPDI</b>                       |                      |                  |                  |                  |                  |               | 0.76 (0.58-0.99) |
| Score, range                      | 42-55                | 55-58            | 58-61            | 61-64            | 64-74            |               |                  |
| Numbers (deaths)                  | 85 (53)              | 80 (50)          | 98 (50)          | 68 (39)          | 81 (48)          |               |                  |
| Model 1, HR (95% CI) <sup>a</sup> | 1.00                 | 0.83 (0.56-1.22) | 0.64 (0.43-0.94) | 0.75 (0.49-1.13) | 0.72 (0.48-1.06) | 0.076         |                  |
| Model 2, HR (95% CI) <sup>b</sup> | 1.00                 | 0.87 (0.59-1.28) | 0.65 (0.44-0.96) | 0.75 (0.49-1.13) | 0.70 (0.47-1.05) | 0.052         |                  |
| Model 3, HR (95% CI) <sup>c</sup> | 1.00                 | 0.69 (0.46-1.06) | 0.51 (0.34-0.78) | 0.73 (0.47-1.13) | 0.64 (0.43-0.97) | 0.046         |                  |
| <b>uPDI</b>                       |                      |                  |                  |                  |                  |               | 1.28 (0.99-1.66) |
| Score, range                      | 35-46                | 46-50            | 50-54            | 54-59            | 59-69            |               |                  |
| Numbers (deaths)                  | 97 (59)              | 74 (34)          | 89 (47)          | 91 (55)          | 61 (45)          |               |                  |
| Model 1, HR (95% CI) <sup>a</sup> | 1.00                 | 0.61 (0.40-0.94) | 0.78 (0.53-1.15) | 0.94 (0.65-1.36) | 1.52 (1.03-2.24) | 0.053         |                  |
| Model 2, HR (95% CI) <sup>b</sup> | 1.00                 | 0.62 (0.41-0.96) | 0.87 (0.59-1.29) | 1.08 (0.71-1.62) | 1.68 (1.07-2.63) | 0.026         |                  |
| Model 3, HR (95% CI) <sup>c</sup> | 1.00                 | 0.70 (0.44-1.10) | 0.88 (0.58-1.34) | 1.01 (0.65-1.57) | 1.53 (0.93-2.49) | 0.089         |                  |

PDI, plant-based diet index; hPDI, healthful plant-based diet index; uPDI, unhealthful plant-based diet index; HR, hazard ratio; CI, confidence interval; Q, quartile.

\* HR and 95% CI were calculated through the Cox proportional hazards regression model.

\*\* P-value for trend based on variables containing the median value for each group.

† Continuous intakes were calculated by per 10 unit increase.

<sup>a</sup> Crude model.

<sup>b</sup> Adjusted for age at diagnosis ( $\geq 60$ ,  $< 60$  years), sex (male, female) and total energy intake (continuous, kcal/d).

<sup>c</sup> Additionally Adjusted for race (Han, others), region (city, rural), education (junior secondary or below, senior high school/technical secondary school, junior college/university or above), income per month ( $< 5000$ ,  $5000-10000$ ,  $\geq 10000$  RMB), marital status (married, unmarried/divorced/widowed), smoking status (yes, no), alcohol intake (continuous, g/d), diet change (yes, no), BMI (continuous, kg/m<sup>2</sup>), physical activity (MET-hours/week), histological type (small cell lung cancer, non-small lung cancer), AJCC stage (I-II, III-IV), and comorbidities (yes, no), surgery (yes, no), chemotherapy (yes, no), radiotherapy (yes, no), targeted treatment (yes, no), and immunotherapy (yes, no).

<sup>d</sup> P-value for linear trend calculated from category median values.

**Table S7.** Plant-based diet indices and risk of lung cancer mortality per 10-point increase in three scores with positive coding for milk, egg, fish, and poultry (n = 408).

|                                              | <b>Hazard ratio (HR) and 95% Confidence intervals (CIs)*</b> |                  |                  |
|----------------------------------------------|--------------------------------------------------------------|------------------|------------------|
|                                              | <b>PDI</b>                                                   | <b>hPDI</b>      | <b>uPDI</b>      |
| <b>positive for milk</b>                     | 0.88 (0.68-1.14)                                             | 0.65 (0.50-0.84) | 1.13 (0.87-1.47) |
| <b>positive for egg</b>                      | 1.22 (0.95-1.58)                                             | 0.71 (0.50-0.92) | 0.96 (0.75-1.23) |
| <b>positive for fish</b>                     | 1.05 (0.81-1.35)                                             | 0.76 (0.59-0.98) | 1.34 (0.99-1.81) |
| <b>positive for poultry</b>                  | 1.25 (0.98-1.59)                                             | 0.75 (0.57-0.97) | 1.01 (0.78-1.30) |
| <b>positive for milk, egg, fish, poultry</b> | 0.80 (0.61-1.05)                                             | 0.75 (0.57-0.97) | 1.25 (0.98-1.59) |

\* HR and 95% CI were calculated through the Cox proportional hazards regression model, continuous intakes were calculated by per 10 unit increase.

The values are hazard ratios calculated with multivariable adjustment for age at diagnosis ( $\geq 60$ ,  $< 60$  years), sex (male, female), total energy intake (continuous, kcal/d), race (Han, others), region (city, rural), education (junior secondary or below, senior high school/technical secondary school, junior college/university or above), income per month ( $< 5000$ ,  $5000-10000$ ,  $\geq 10000$  RMB), marital status (married, unmarried/divorced/widowed), smoking status (yes, no), alcohol intake (continuous, g/d), diet change (yes, no), BMI (continuous, kg/m<sup>2</sup>), physical activity (MET-hours/week), histological type (small cell lung cancer, non-small lung cancer), AJCC stage (I-II, III-IV), and comorbidities (yes, no), surgery (yes, no), chemotherapy (yes, no), radiotherapy (yes, no), targeted treatment (yes, no), and immunotherapy (yes, no).

**a**

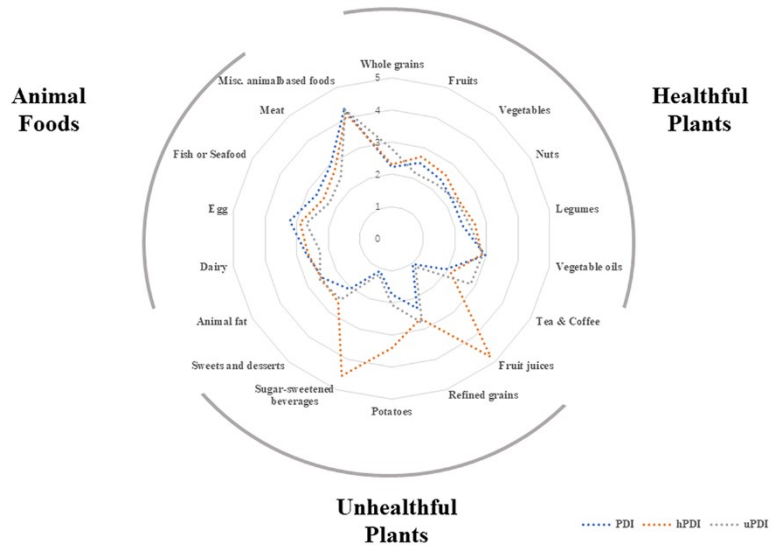

**b**

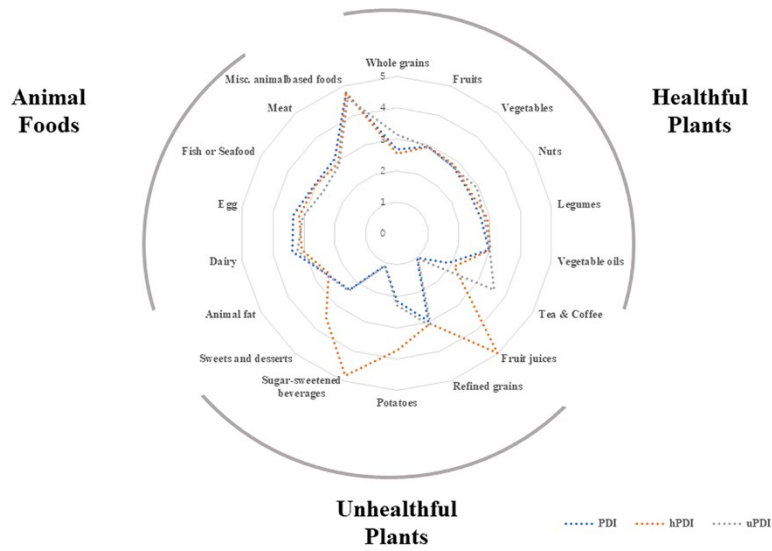

**c**

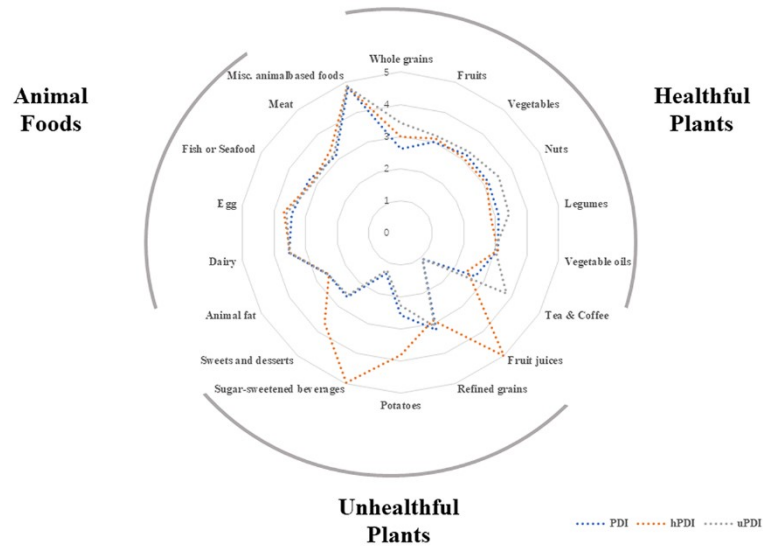

Fig S1. Radar plot for food groups contributing to three plant-based diet indices among lung cancer survivors. The blue line for PDI score, the orange line for hPDI score, the gray line for uPDI score. If the line is pulled toward the outside of the circle, the median score is higher, indicating greater consumption of that food group. **a:** The grid line represents the median score assigned for each food group for the Q1. **b:** The grid line represents the median score assigned for each food group for the Q2. **c:** The grid line represents the median score assigned for each food group for the Q3.
